# Supplementary material for: Development of a screening system for inteins active in protein splicing based on intein insertion into the LacZα-peptide
Source: publisher site journal article supplement (doi:10.1515/hsz-2016-0229), 2016-09-15
Supplement: Supplementary file 1 [file hsz-2016-0229_Suppl.docx]

**Development of a screening system for inteins active in protein splicing based on intein insertion into the LacZ-peptide**

Maximilian Neugebauer, Jana K. Böcker, Julian C. J. Matern, Shmuel Pietrokovski, Henning D. Mootz

**Supplementary Material**

**Table S1** List of expression plasmids used in this study.

| plasmid name | description | backbone |
| --- | --- | --- |
| pMN04 | MBP-LacZα(T22S) | pMAL-c2X |
| pMN05 | MBP-LacZα1-21-M86-LacZα(T22S)22-65 | pMAL-c2X |
| pMN06 | MBP-LacZα (R46G;P47G) | pMAL-c2X |
| pMN07 | MBP-LacZα(R46G;P47G)1-47-M86-LacZα48-65 | pMAL-c2X |
| pMN08 | MBP-LacZα1-5-M86-LacZα6-65 | pMAL-c2X |
| pMN09 | MBP-LacZα1-34-M86-LacZα35-65 | pMAL-c2X |
| pMN10 | MBP-LacZα1-38-M86-LacZα39-65 | pMAL-c2X |
| pMN13 | MBP-LacZα1-5-M86(C1A)-LacZα6-65 | pMAL-c2X |
| pMN14 | MBP-LacZα1-5-M86(C1A;N154A)-LacZα6-65 | pMAL-c2X |
| pMN17 | LacZα-Trx-His6 | pBluescript KS (-) |
| pMN18; pBluescript* | SBP-LacZα-Trx-His6 | pBluescript KS (-) |
| pMN21; pBluescript* | SBP-LacZα1-21-M86-LacZα(T22S)22-65-Trx-His6 | pBluescript KS (-) |
| pMN22; pBluescript* | SBP-LacZα1-34-M86-LacZα35-65-Trx-His6 | pBluescript KS (-) |
| pMN25 | MBP-LacZα1-21-M86(C1A)-LacZα(T22S)22-65 | pMAL-c2X |
| pMN26 | MBP-LacZα1-21-M86(N154A)-LacZα(T22S)22-65 | pMAL-c2X |
| pMN27 | MBP-LacZα1-21-M86(C1A;N154A)-LacZα(T22S)22-65 | pMAL-c2X |
| pMN28 | MBP-LacZα(R46G;P47G)1-47-M86(C1A)-LacZα48-65 | pMAL-c2X |
| pMN29 | MBP-LacZα(R46G;P47G)1-47-M86(N154A)-LacZα48-65 | pMAL-c2X |
| pMN30 | MBP-LacZα(R46G;P47G)1-47-M86(C1A;N154A)-LacZα48-65 | pMAL-c2X |
| pMN31 | MBP-LacZα1-34-M86(C1A)-LacZα35-65 | pMAL-c2X |
| pMN32 | MBP-LacZα1-34-M86(N154A)-LacZα35-65 | pMAL-c2X |
| pMN33 | MBP-LacZα1-34-M86(C1A;N154A)-LacZα35-65 | pMAL-c2X |
| pMN34 | MBP-LacZα1-38-M86(C1A)-LacZα39-65 | pMAL-c2X |
| pMN35 | MBP-LacZα1-38-M86(N154A)-LacZα39-65 | pMAL-c2X |
| pMN36 | MBP-LacZα1-38-M86(C1A;N154A)-LacZα39-65 | pMAL-c2X |
| pMN39; pBluescript* | SBP-LacZα1-21-M86(C1A)-LacZα(T22S)22-65-Trx-His6 | pBluescript KS (-) |
| pMN40; pBluescript* | SBP-LacZα1-21-M86(N154A)-LacZα(T22S)22-65-Trx-His6 | pBluescript KS (-) |
| pMN41; pBluescript* | SBP-LacZα1-21-M86(C1A;N154A)-LacZα(T22S)22-65-Trx-His6 | pBluescript KS (-) |
| pMN42; pBluescript* | SBP-LacZα1-34-M86(C1A)-LacZα35-65-Trx-His6 | pBluescript KS (-) |
| pMN43; pBluescript* | SBP-LacZα1-34-M86(N154A)-LacZα35-65-Trx-His6 | pBluescript KS (-) |
| pMN44; pBluescript* | SBP-LacZα1-34-M86(C1A;N154A)-LacZα35-65-Trx-His6 | pBluescript KS (-) |
| pMN59; pBluescript* | SBP-LacZα1-34-Vidal T4Lh1-LacZα35-65-Trx-His6 | pBluescript KS (-) |
| pMN61 | M8612-154-LacZα(T22S)22-65-Trx-His6 | pQLinkH |
| pMN63; pBluescript* | SBP-LacZα1-34-Vidal Uvsx2-LacZα35-65-Trx-His6 | pBluescript KS (-) |
| pMN64; pBluescript* | SBP-LacZα1-34-GP41-1-LacZα35-65-Trx-His6 | pBluescript KS (-) |
| pMN74 | MBP-LacZα1-21-M861-11, M8612-154-LacZα(T22S)22-65-Trx-His6 | pQLinkH |
| pMN75 | MBP-LacZα1-21-M86(I2X)-LacZα(T22S)22-65 | pMAL-c2X |
| pMN86;pMAL-c2X* | MBP-LacZα(...SLA__VV...) | pMAL-c2X |
| pMN87; pBluescript*/MBP | MBP-LacZα1-21-M86-LacZα(T22S)22-65-Trx-His6 | pBluescript KS (-) |
| pMN88; pBluescript*/MBP | MBP-LacZα1-21-M86(I2X)-LacZα(T22S)22-65-Trx-His6 | pBluescript KS (-) |
| pMN89 | MBP-LacZα1-21-M861-11 | pQLinkH |
